# Supplementary material for: Identification of Aluminum Tolerance in Ethiopian Chickpea (Cicer arietinum L.) Germplasm
Source: MDPI journal article supplement (doi:10.3390/agronomy12040948), 2022-04-15
Supplement: s1 [file s1]

Table S2. Mean relative performances of chickpea genotypes for the five Al concentrations (50,100,120, 150 and 200)  $\mu$ M relative to 0  $\mu$ M Al.

| Relative root length |   |                    |                    |                    |                    |                    | Relative shoot length |                    |                   |                    |                   |                   | Relative number of leaves |                   |                   |                   |                   |                   |
|----------------------|---|--------------------|--------------------|--------------------|--------------------|--------------------|-----------------------|--------------------|-------------------|--------------------|-------------------|-------------------|---------------------------|-------------------|-------------------|-------------------|-------------------|-------------------|
| Variety              | 0 | 50                 | 100                | 120                | 150                | 200                | 0                     | 50                 | 100               | 120                | 150               | 200               | 0                         | 50                | 100               | 120               | 150               | 200               |
| Akaki                | - | 0.92 <sup>b</sup>  | 0.47 <sup>c</sup>  | 0.26 <sup>e</sup>  | 0.24 <sup>d</sup>  | 0.23 <sup>b</sup>  | -                     | 1.08 <sup>ab</sup> | 0.91 <sup>a</sup> | 0.63 <sup>b</sup>  | 0.58 <sup>a</sup> | 0.64 <sup>a</sup> | -                         | 1.07 <sup>a</sup> | 0.76 <sup>a</sup> | 0.71 <sup>a</sup> | 0.79 <sup>a</sup> | 0.73 <sup>a</sup> |
| Dalota               | - | 1.77 <sup>a</sup>  | 1.16 <sup>a</sup>  | 0.64 <sup>a</sup>  | 0.62 <sup>a</sup>  | 0.44 <sup>a</sup>  | -                     | 1.08 <sup>ab</sup> | 0.97 <sup>a</sup> | 0.82 <sup>a</sup>  | 0.84 <sup>a</sup> | 0.67 <sup>a</sup> | -                         | 0.96 <sup>a</sup> | 0.71 <sup>a</sup> | 0.93 <sup>a</sup> | 0.78 <sup>a</sup> | 0.60 <sup>a</sup> |
| Dubie                | - | 1.09 <sup>b</sup>  | 0.58 <sup>bc</sup> | 0.33 <sup>de</sup> | 0.32 <sup>cd</sup> | 0.24 <sup>b</sup>  | -                     | 0.81 <sup>a</sup>  | 0.78 <sup>a</sup> | 0.72 <sup>ab</sup> | 0.63 <sup>a</sup> | 0.50 <sup>a</sup> | -                         | 0.84 <sup>a</sup> | 0.59 <sup>a</sup> | 0.88 <sup>a</sup> | 0.59 <sup>a</sup> | 0.50 <sup>a</sup> |
| Wollega LV           | - | 1.56 <sup>ab</sup> | 0.81 <sup>b</sup>  | 0.53 <sup>b</sup>  | 0.43 <sup>b</sup>  | 0.32 <sup>ab</sup> | -                     | 1.16 <sup>a</sup>  | 0.87 <sup>a</sup> | 0.78 <sup>a</sup>  | 0.62 <sup>a</sup> | 0.58 <sup>a</sup> | -                         | 1.07 <sup>a</sup> | 0.63 <sup>a</sup> | 0.75 <sup>a</sup> | 0.72 <sup>a</sup> | 0.55 <sup>a</sup> |
| Minjar               | - | 0.96 <sup>b</sup>  | 0.55 <sup>bc</sup> | 0.41 <sup>cd</sup> | 0.33 <sup>cd</sup> | 0.29 <sup>ab</sup> | -                     | 1.00 <sup>ab</sup> | 0.88 <sup>a</sup> | 0.74 <sup>ab</sup> | 0.63 <sup>a</sup> | 0.62 <sup>a</sup> | -                         | 1.04 <sup>a</sup> | 0.81 <sup>a</sup> | 0.68 <sup>a</sup> | 0.73 <sup>a</sup> | 0.67 <sup>a</sup> |
| Natoli               | - | 1.46 <sup>ab</sup> | 0.61 <sup>bc</sup> | 0.44 <sup>bc</sup> | 0.35 <sup>bc</sup> | 0.28 <sup>ab</sup> | -                     | 1.05 <sup>ab</sup> | 0.76 <sup>a</sup> | 0.70 <sup>ab</sup> | 0.67 <sup>a</sup> | 0.49 <sup>a</sup> | -                         | 1.01 <sup>a</sup> | 0.57 <sup>a</sup> | 0.79 <sup>a</sup> | 0.83 <sup>a</sup> | 0.36 <sup>a</sup> |
| Range                | - | 0.90 - 2.15        | 0.32 - 1.24        | 0.24 - 0.67        | 0.23 - 0.67        | 0.21 - 0.54        | -                     | 0.66 - 1.20        | 0.58 - 1.23       | 0.60 - 0.87        | 0.52 - 1.04       | 0.33 - 0.81       | -                         | 0.74 - 1.31       | 0.46 - 1.06       | 0.60 - 0.96       | 0.59 - 0.91       | 0.19 - 0.87       |
| G.M                  | - | 1.29               | 0.70               | 0.44               | 0.38               | 0.30               | -                     | 1.03               | 0.86              | 0.73               | 0.67              | 0.59              | -                         | 1.00              | 0.68              | 0.79              | 0.74              | 0.58              |
| SEM                  | - | 0.11               | 0.08               | 0.04               | 0.04               | 0.03               | -                     | 0.04               | 0.05              | 0.02               | 0.038             | 0.04              | -                         | 0.05              | 0.05              | 0.03              | 0.03              | 0.06              |
| LSD                  | - | 0.65               | 0.32               | 0.10               | 0.09               | 0.18               | -                     | 0.33               | 0.54              | 0.15               | 0.36              | 0.37              | -                         | 0.60              | 0.46              | 0.28              | 0.26              | 0.54              |
| CV %                 | - | 19.68              | 17.79              | 8.58               | 9.31               | 22.39              | -                     | 12.34              | 24.32             | 8.10               | 20.91             | 24.37             | -                         | 23.37             | 25.969            | 13.80             | 13.38             | 36.43             |

  

| Relative number of lateral roots |   |                    |                    |                    |                    |                    | Relative fresh weight roots |                   |                   |                   |                   |                    | Relative fresh weight shoots |                    |                   |                   |                   |                    |
|----------------------------------|---|--------------------|--------------------|--------------------|--------------------|--------------------|-----------------------------|-------------------|-------------------|-------------------|-------------------|--------------------|------------------------------|--------------------|-------------------|-------------------|-------------------|--------------------|
| Variety                          | 0 | 50                 | 100                | 120                | 150                | 200                | 0                           | 50                | 100               | 120               | 150               | 200                | 0                            | 50                 | 100               | 120               | 150               | 200                |
| Akaki                            | - | 0.99 <sup>ab</sup> | 0.94 <sup>b</sup>  | 0.83 <sup>c</sup>  | 0.61 <sup>cd</sup> | 0.73 <sup>a</sup>  | -                           | 0.97 <sup>b</sup> | 0.55 <sup>a</sup> | 0.53 <sup>b</sup> | 0.49 <sup>b</sup> | 0.49 <sup>a</sup>  | -                            | 0.92 <sup>ab</sup> | 0.72 <sup>a</sup> | 0.58 <sup>b</sup> | 0.55 <sup>a</sup> | 0.59 <sup>a</sup>  |
| Dalota                           | - | 1.48 <sup>a</sup>  | 1.31 <sup>a</sup>  | 1.32 <sup>a</sup>  | 1.05 <sup>a</sup>  | 0.50 <sup>ab</sup> | -                           | 1.55 <sup>a</sup> | 0.72 <sup>a</sup> | 0.85 <sup>a</sup> | 0.77 <sup>a</sup> | 0.47 <sup>a</sup>  | -                            | 1.13 <sup>a</sup>  | 0.94 <sup>a</sup> | 0.81 <sup>a</sup> | 0.76 <sup>a</sup> | 0.63 <sup>a</sup>  |
| Dubie                            | - | 0.83 <sup>b</sup>  | 0.8 <sup>bc</sup>  | 0.73 <sup>d</sup>  | 0.53 <sup>d</sup>  | 0.33 <sup>b</sup>  | -                           | 0.85 <sup>b</sup> | 0.5 <sup>a</sup>  | 0.48 <sup>b</sup> | 0.43 <sup>b</sup> | 0.29 <sup>a</sup>  | -                            | 0.81 <sup>b</sup>  | 0.66 <sup>a</sup> | 0.61 <sup>b</sup> | 0.56 <sup>a</sup> | 0.44 <sup>b</sup>  |
| Wollega LV                       | - | 1.25 <sup>ab</sup> | 0.88 <sup>b</sup>  | 0.80 <sup>cd</sup> | 0.73 <sup>bc</sup> | 0.56 <sup>ab</sup> | -                           | 1.04 <sup>b</sup> | 0.61 <sup>a</sup> | 0.53 <sup>b</sup> | 0.53 <sup>b</sup> | 0.45 <sup>a</sup>  | -                            | 1.00 <sup>ab</sup> | 0.73 <sup>a</sup> | 0.59 <sup>b</sup> | 0.54 <sup>a</sup> | 0.56 <sup>ab</sup> |
| Minjar                           | - | 0.87 <sup>b</sup>  | 0.71 <sup>c</sup>  | 0.82 <sup>c</sup>  | 0.58 <sup>d</sup>  | 0.50 <sup>ab</sup> | -                           | 0.92 <sup>b</sup> | 0.54 <sup>a</sup> | 0.61 <sup>b</sup> | 0.53 <sup>b</sup> | 0.44 <sup>a</sup>  | -                            | 0.9 <sup>ab</sup>  | 0.73 <sup>a</sup> | 0.64 <sup>b</sup> | 0.56 <sup>a</sup> | 0.56 <sup>ab</sup> |
| Natoli                           | - | 1.05 <sup>ab</sup> | 0.82 <sup>bc</sup> | 1.04 <sup>B</sup>  | 0.77 <sup>b</sup>  | 0.46 <sup>ab</sup> | -                           | 0.99 <sup>b</sup> | 0.55 <sup>a</sup> | 0.63 <sup>b</sup> | 0.49 <sup>b</sup> | 0.39 <sup>ab</sup> | -                            | 0.95 <sup>ab</sup> | 0.68 <sup>a</sup> | 0.58 <sup>b</sup> | 0.61 <sup>a</sup> | 0.52 <sup>ab</sup> |
| Range                            | - | 0.66 - 1.72        | 0.69 - 1.32        | 0.66 - 1.41        | 0.51 - 1.11        | 0.27 - 0.75        | -                           | 0.73 - 1.57       | 0.45 - 0.89       | 0.46 - 1.05       | 0.42 - 0.90       | 0.29 - 0.58        | -                            | 0.71 - 1.23        | 0.52 - 1.01       | 0.55 - 0.87       | 0.49 - 0.88       | 0.38 - 0.66        |
| G.M                              | - | 1.08               | 0.91               | 0.92               | 0.71               | 0.51               | -                           | 1.05              | 0.59              | 0.61              | 0.55              | 0.43               | -                            | 0.96               | 0.75              | 0.64              | 0.60              | 0.55               |
| SEM                              | - | 0.08               | 0.06               | 0.06               | 0.05               | 0.05               | -                           | 0.07              | 0.034             | 0.05              | 0.04              | 0.02               | -                            | 0.037              | 0.043             | 0.03              | 0.03              | 0.02               |
| LSD                              | - | 0.50               | 0.15               | 0.09               | 0.16               | 0.35               | -                           | 0.27              | 0.31              | 0.26              | 0.15              | 0.13               | -                            | 0.28               | 0.40              | 0.13              | 0.27              | 0.14               |
| CV                               | - | 18.02              | 6.19               | 3.71               | 8.43               | 26.53              | -                           | 10.02             | 20.32             | 16.40             | 10.40             | 11.67              | -                            | 11.55              | 20.89             | 7.84              | 17.46             | 9.70               |

Means with the same letter are not significantly different. G.M, Grand Mean; SEM, Standard error of mean; CV, Coefficient of variation.
