# Supplementary material for: Identification of Aluminum Tolerance in Ethiopian Chickpea (Cicer arietinum L.) Germplasm
Source: MDPI journal article supplement (doi:10.3390/agronomy12040948), 2022-04-15
Supplement: s1 [file s1]

Table S1. Descriptions of chickpea genotypes used in the screening experiment.

| S/N | Genotype                | Type   | Origin   | Classification   | Year of release | Seed Source |
|-----|-------------------------|--------|----------|------------------|-----------------|-------------|
| 1   | Akaki                   | Desi   | ICRISAT  | Released variety | 1995            | DZARC       |
| 2   | Arerti                  | Kabuli | ICARDA   | Released variety | 1999            | DZARC       |
| 3   | Chefe                   | Kabuli | ICARDA   | Released variety | 2004            | DZARC       |
| 4   | Dalota                  | Desi   | ICRISAT  | Released variety | 2013            | DZARC       |
| 5   | Dhera                   | Kabuli | ICARDA   | Released variety | 2016            | DZARC       |
| 6   | Dimtu                   | Desi   | ICRISAT  | Released variety | 2016            | DZARC       |
| 7   | Dubie                   | Desi   | Ethiopia | Released variety | 1978            | DZARC       |
| 8   | Dz-10-11                | Desi   | Ethiopia | Released variety | 1974            | DZARC       |
| 9   | Dz-10-4                 | Kabuli | Ethiopia | Released variety | 1974            | DZARC       |
| 10  | Ejere                   | Kabuli | ICARDA   | Released variety | 2005            | DZARC       |
| 11  | Fetenech                | Desi   | ICRISAT  | Released variety | 2006            | DZARC       |
| 12  | Habru                   | Kabuli | ICARDA   | Released variety | 2004            | DZARC       |
| 13  | Hora                    | Kabuli | ICARDA   | Released variety | 2016            | DZARC       |
| 14  | Kasech                  | Kabuli | ICRISAT  | Released variety | 2011            | DZARC       |
| 15  | Kobo                    | Kabuli | ICRISAT  | Released variety | 2012            | DZARC       |
| 16  | Mariye                  | Desi   | ICRISAT  | Released variety | 1985            | DZARC       |
| 17  | Mastewal                | Desi   | ICRISAT  | Released variety | 2006            | DZARC       |
| 18  | Minjar                  | Desi   | ICRISAT  | Released variety | 2010            | DZARC       |
| 19  | Natoli                  | Desi   | ICRISAT  | Released variety | 2007            | DZARC       |
| 20  | Shasho                  | Kabuli | ICARDA   | Released variety | 1999            | DZARC       |
| 21  | Teji                    | Kabuli | ICARDA   | Released variety | 2005            | DZARC       |
| 22  | Teketay                 | Desi   | ICRISAT  | Released variety | 2013            | DZARC       |
| 23  | Worku                   | Desi   | ICRISAT  | Released variety | 1994            | DZARC       |
| 24  | Yelbie                  | Kabuli | ICRISAT  | Released variety | 2006            | DZARC       |
| 25  | Wollega Local           | Desi   | Ethiopia | Local variety    | Unknown         | FARMERS     |
| 26  | DZ-2012-CK-0032         | Desi   | -        | Advanced line    | -               | DZARC       |
| 27  | DZ-2012-CK-0034         | Desi   | -        | Advanced line    | -               | DZARC       |
| 28  | DZ-2012-CK-20113-2-0042 | Desi   | -        | Advanced line    | -               | DZARC       |
| 29  | DZ-2012-CK-0233         | Desi   | -        | Advanced line    | -               | DZARC       |
| 30  | DZ-2012-CK-0237         | Desi   | -        | Advanced line    | -               | DZARC       |
| 31  | DZ-2012-CK-0313         | Desi   | -        | Advanced line    | -               | DZARC       |

DZARC: Debrezeit Agricultural Research Center; ICARDA: International Center for Agricultural Research in the Dry Areas, ICRISAT; International Crops Research Institute for the Semi-Arid Tropics.
